# Supplementary material for: Extending the range and reach of physically-based Greenland ice sheet sea-level projections
Source: Copernicus journal article supplement (doi:10.5194/tc-19-6887-2025), 2025-12-18
Supplement: Supplementary file 1 [file tc-19-6887-2025-supplement.pdf]

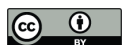

*Supplement of*

## **Extending the range and reach of physically-based Greenland ice sheet sea-level projections**

**Heiko Goelzer et al.**

*Correspondence to:* Heiko Goelzer ([heig@norceresearch.no](mailto:heig@norceresearch.no))

The copyright of individual parts of the supplement might differ from the article licence.

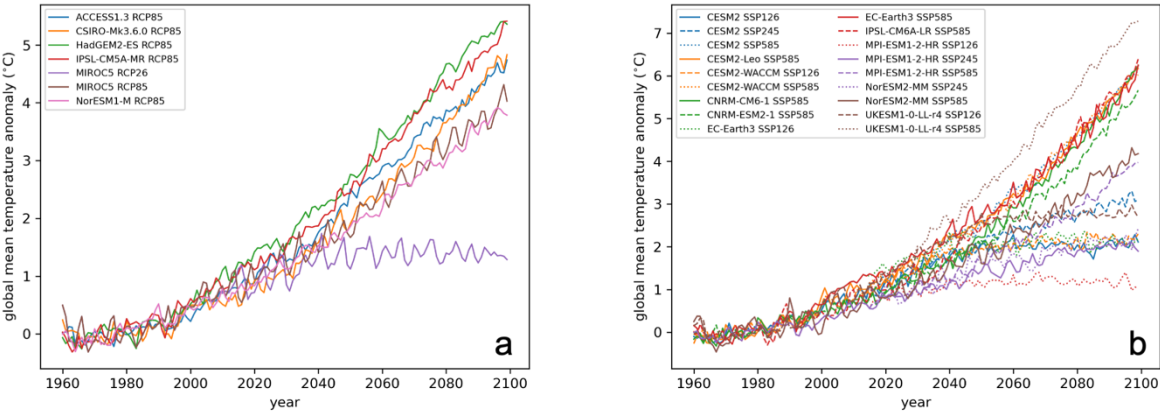

**Figure S1.** Global mean temperature anomalies to year 2100 relative to 1960-1989 for all ESM experiments used in this study split between CMIP5 (a) and CMIP6 (b).
